# Supplementary material
Source: bioRxiv or medRxiv preprint supplement (https://medrxiv.org/highwire/filestream/76608/field_highwire_adjunct_files/0/2020.04.13.20063529-1.pdf)
Supplement: Supplementary file [file 2020.04.13.20063529-1.pdf]

## Supplementary Information:

### Infection dynamics model (Figure 1a-c):

To demonstrate the effect of masks, we used a simple SIR model of the dynamics of infection taking several populations into account: S: susceptible individuals, I: infected, R: resistant, CI: critically ill, D: dead. The goal of the model is not to predict any particular infection in a completely realistic way, but rather to illustrate the impact of reducing infectivity at high versus low R0 values.

$$\frac{dI}{dt} = \beta \cdot I \cdot \frac{S}{N_t} - \rho \cdot I - \gamma \cdot I \quad (1)$$

$$\frac{dR}{dt} = \rho \cdot I \quad (2)$$

$$\frac{dCI}{dt} = \gamma \cdot I - \delta \cdot (1 + 8\theta(CI - CI_{max})) - \rho' \cdot CI \quad (3)$$

$$D = N_t - I - CI - R \quad (4)$$

Where  $\theta(CI - CI_{max})$  is the Heaviside function changing the death rate when the critically ill number saturates ICU beds. Parameters are defined in Table S1.

Wearing of masks was implemented in the model as a reduction of infectivity between 8-16%<sup>1-8</sup>.

Total population size was taken as  $8 \times 10^6$

| Parameter name              | Symbol   | Units             | Values          |
|-----------------------------|----------|-------------------|-----------------|
| Infection rate              | $\beta$  | day <sup>-1</sup> | 0.17-0.4        |
| Recovery rate               | $\rho$   | day <sup>-1</sup> | 0.16            |
| Critical deterioration rate | $\gamma$ | day <sup>-1</sup> | 0.003           |
| Death rate                  | $\delta$ | day <sup>-1</sup> | 0.0036          |
| Recovery of critically ill  | $\rho'$  | day <sup>-1</sup> | 0.0025-0.005    |
| Total population size       | $N_t$    | Individuals       | $8 \times 10^6$ |

|                         |            |      |      |
|-------------------------|------------|------|------|
| Max. number of ICU beds | $CI_{max}$ | Beds | 4000 |
|-------------------------|------------|------|------|

In the absence of ICU beds, 86% of the critical care patients die, whereas if ICU beds are not limiting, only 40% of critical care patients would die. The total fraction of critical care patients is 1.8% of the total number of infected cases<sup>9</sup>.

Data for (Figure 1d and 1e) was adapted from Ferguson *et al*<sup>9</sup> (16/3/2020- Table 4) The wearing of masks is assumed to reduce infectivity by 10%. We, therefore, compared the results of Ferguson *et al* (Table 4) at different R0 and for different social-distancing policy measures.

### Supplementary References

1. Suess T, Remschmidt C, Schink SB, et al. The role of facemasks and hand hygiene in the prevention of influenza transmission in households: results from a cluster randomised trial; Berlin, Germany, 2009-2011. *BMC Infect Dis* 2012;12:26.
2. MacIntyre CR, Cauchemez S, Dwyer DE, et al. Face mask use and control of respiratory virus transmission in households. *Emerging infectious diseases* 2009;15:233-41.
3. Xiao J, Shiu EYC, Gao H, et al. Nonpharmaceutical Measures for Pandemic Influenza in Nonhealthcare Settings-Personal Protective and Environmental Measures. *Emerging infectious diseases* 2020;26.
4. Davies A, Thompson KA, Giri K, Kafatos G, Walker J, Bennett A. Testing the efficacy of homemade masks: would they protect in an influenza pandemic? *Disaster Med Public Health Prep* 2013;7:413-8.
5. Aiello AE, Perez V, Coulborn RM, Davis BM, Uddin M, Monto AS. Facemasks, hand hygiene, and influenza among young adults: a randomized intervention trial. *PLoS One* 2012;7:e29744.
6. Tracht SM, Del Valle SY, Hyman JM. Mathematical modeling of the effectiveness of facemasks in reducing the spread of novel influenza A (H1N1). *PLoS One* 2010;5:e9018.
7. Leung NHL, Chu DKW, Shiu EYC, et al. Respiratory virus shedding in exhaled breath and efficacy of face masks. *Nature medicine* 2020.
8. Dharmadhikari AS, Mphahlele M, Stoltz A, et al. Surgical face masks worn by patients with multidrug-resistant tuberculosis: impact on infectivity of air on a hospital ward. *American journal of respiratory and critical care medicine* 2012;185:1104-9.
9. Report 9: Impact of non-pharmaceutical interventions (NPIs) to reduce COVID-19 mortality and healthcare demand. 2020. (Accessed 8 April 2020, 2020, at <http://hdl.handle.net/10044/1/77482>.)
